# Supplementary material for: Barriers to deferred cord clamping in preterm infants
Source: PubMed Central journal article supplement — Arch Dis Child Fetal Neonatal Ed. 2014 Jun 5;99(5):F391–4. doi: 10.1136/archdischild-2014-305968 (PMC4145419; doi:10.1136/archdischild-2014-305968), 2014-06-05
Supplement: fetalneonatal-2014-305968-s1.pdf [file fetalneonatal-2014-305968-s1.pdf]

## Appendix 1 – Topic Guide

### 1. Can you describe what you as a team do immediately after a very preterm baby (<32 weeks) is born?

Prompts:

- own role?
- How do you manage provision of respiratory support/ thermoregulation?
- Do you engage in any strategies such to facilitate placental transfusion (cord clamping/ cord milking)?

Prompts:

- timing of cord clamping, how long they wait
- when they give the uterotonic drug when they delay cord clamping
- whether they resuscitate the baby whilst waiting to clamp the cord
- Where is the baby in relation to the mother?

### 2. Why do you do what you do?

- Why do you do it that way?

### 3. What are the main strengths and weaknesses of the way in which you manage very pre-term babies?

### 4. Do you do practice deferred cord clamping or cord milking (as appropriate) with all babies or only some?

- How do you decide which babies you will manage in this way?

Prompts:

- baby's condition,
- mother's condition,
- perceived attitudes of parent/s,
- availability of staff/equipment
- Are there circumstances when very pre-term babies are managed differently? And, if so, what are they?
- Do you think the procedure is appropriate for all preterm babies?
- If not, which babies is it most appropriate for? And which babies is it least appropriate for?

**5. What are your practical experiences of managing very pre-term babies in this way?**

- How does the team manage assessment and stabilisation?
- What are the practical difficulties and how are they managed?
- What has been the reaction of mothers and/or partners?

**6. How long have you been managing very pre-term babies in this**

**7. What factors influenced your decision to start managing very pre-term babies in this way?**

**8. How easy was it to implement this way of working?**

Prompts:

- Facilitators
- Barriers

**9. If another unit was thinking of introducing this practice, what would you recommend them to do?**

- Are there any pitfalls which they should try to avoid?

**10. How do you think you might improve the initial bedside care of pre-term babies?**
